# Supplementary material for: Microbioreactor arrays with integrated mixers and fluid injectors for high-throughput experimentation with pH and dissolved oxygen control
Source: Royal Society of Chemistry journal article supplement (doi:10.1039/b608014f), 2006-01-01

# Electronic Supplementary Information: Fabrication Process Diagram

## Microbioreactor arrays with integrated mixers and fluid injectors for high-throughput experimentation with pH and dissolved oxygen control

Harry L. T. Lee, Paolo Boccazzi, Rajeev J. Ram, and Anthony J. Sinskey

### Device fabrication steps:

- a) Machine positive master molds with a computer numeric controlled milling machine.
- b) Polish molds in methylene chloride vapor to eliminate microscopic tooling marks for optical clarity and easy mold release.
- c) Cast negative device fabrication molds from PDMS.
- d) Treat the surface with a fluorosilane compound to prevent adhesion to PDMS.
- e) Cast the devices using the negative PDMS molds, which define internal device features, and polycarbonate molds, which define external device features. Embed oxygen sensors into base layer and cure for 1 hour at 65°C
- f) Spin coat a fluorosilane treated silicon wafer with PDMS, monitoring the thickness with a low coherence interferometer. Cure for 30min
- g) De-mold mixer and valve device layer and bond to partially cured membrane. Cure for 30min
- h) cut the excess membrane and peel mixer and valve device layer from the silicon wafer.
- i) De-mold the base layer. Deposit pH sensor in base layer, align with mixer and valve layer and seal.
- j) Cure for 8 hours at 50°C.

Machine master molds in polycarbonate (positive)

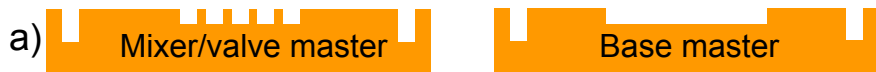

Vapor polish – Methylene chloride, 3-5 seconds

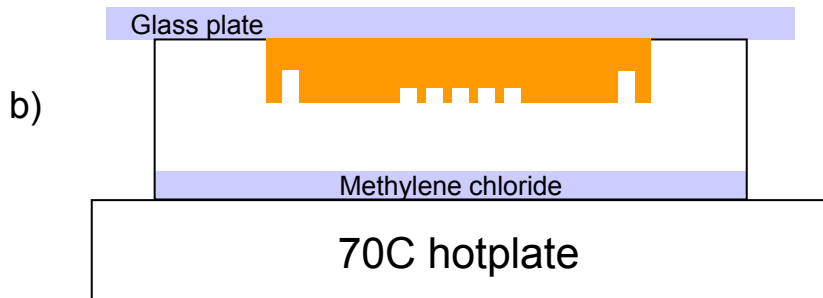

Cast PDMS molds (negative) 10:1 Sylgard 184, 4 hours 65°C

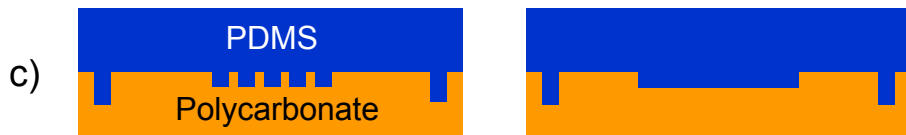

d) Surface treatment under vacuum 70°C, >4hours  
(Tridecafluoro-1,1,2,2-Tetrahydrooctyl)-1-Trichlorosilane)

Cast devices, embed DO sensor, seal top with gasket plate and bottom plate

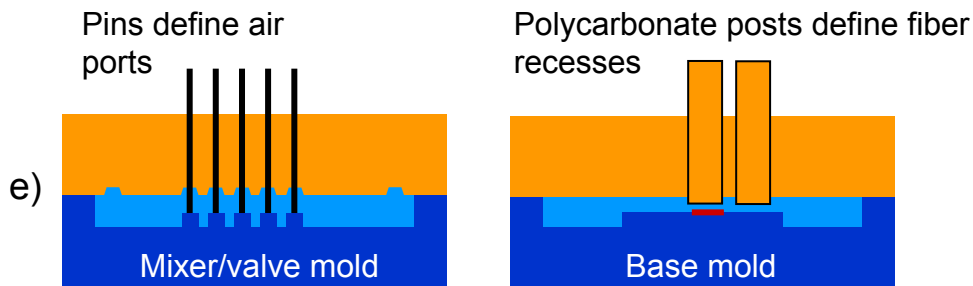

Spin membrane, monitor thickness online with coherence interferometer, cure for 1/2 hour @ 65°C

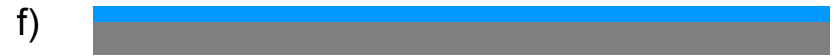

Seal top to membrane, cure for 1/2 hour @ 65°C

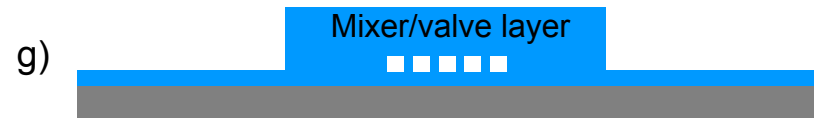

Cutout membrane and top, seal to base

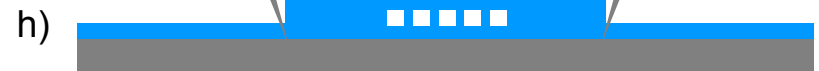

Deposit pH sensor spots, Align and bond

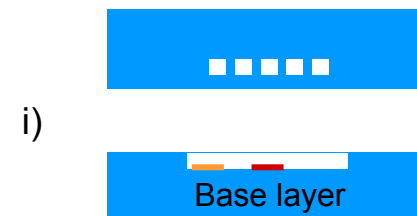

Cure for 8+ hours @ 50°C

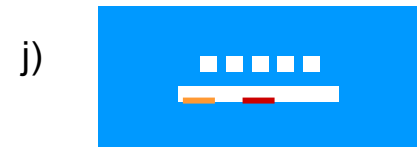

Supplement: b608014f-e2.pdf [file b608014f-e2.pdf]
